# Supplementary material for: Upconversion nanocrystal ‘armoured’ silica fibres with superior photoluminescence for miRNA detection
Source: Royal Society of Chemistry journal article supplement (doi:10.1039/c8cc03480j), 2018-01-01
Supplement: c8cc03480j1.pdf [file c8cc03480j1.pdf]

## Supporting Information

### Upconversion nanocrystal 'armoured' silica fibres with superior photoluminescence for miRNA detection

Gang Wang,<sup>a</sup> Yike Fu<sup>a</sup>, Zhaohui Ren<sup>a</sup>, Jie Huang<sup>b</sup>, Serena Best<sup>c</sup> and Xiang Li<sup>a\*</sup>, Gaorong Han<sup>a</sup>

<sup>a</sup> State Key Laboratory of Silicon Materials, School of Materials Science and Engineering, Zhejiang University, Hangzhou, Zhejiang 310027, P. R. China. E-mail: [xiang.li@zju.edu.cn](mailto:xiang.li@zju.edu.cn), [hgr@zju.edu.cn](mailto:hgr@zju.edu.cn)

<sup>b</sup> Department of Mechanical Engineering, University College London, London WC1E 7JE, UK

<sup>c</sup> Department of Materials Science and Metallurgy, University of Cambridge, Cambridge CB3 0FS, UK

Corresponding author: [xiang.li@zju.edu.cn](mailto:xiang.li@zju.edu.cn) (XL)

## Experimental Details

### Materials

Tetraethyl orthosilicate (TEOS, A.R.), sodium chloride (NaCl, A.R.), ethylene glycol (EG, A.R.) and N-hydroxy-succinimide (NHS, 97.0–102.0%) were obtained from Sinopharm Chemical Reagent Co., Ltd (Shanghai, China). Polyvinyl alcohol (PVA, Mw = 88 000), 1-ethyl-3-(3-dimethylaminopropyl) carbodiimide (EDC, 98.0%) and phosphoric acid ( $\text{H}_3\text{PO}_4$ ,  $\geq 85$  wt%) were purchased from Aladdin Reagents (Shanghai, China). Polyethylenimine, branched (PEI,  $M_w = 25\ 000$ ) were acquired from Sigma-Aldrich (St. Louis, MO, USA). Yttrium chloride hexahydrate ( $\text{YCl}_3 \cdot 6\text{H}_2\text{O}$ , 99.99%), ytterbium(III) chloride hexahydrate ( $\text{YbCl}_3 \cdot 6\text{H}_2\text{O}$ , 99.9%), erbium chloride hexahydrate ( $\text{ErCl}_3 \cdot 6\text{H}_2\text{O}$ , 99.5%) and ammonium chloride ( $\text{NH}_4\text{Cl}$ , 99.99%) were purchased from Macklin Biochemical Co., Ltd (Shanghai, China). HPLC-purified miRNA-21, miRNA-195, miRNA-21 with single mismatch, miRNA-21 with three base mismatches and carboxyl-modified molecular beacon were purchased from Sangong Biotech (Shanghai China), and validated by quality-control mass spectroscopy. The sequences is shown in table 1.

### Synthesis of $\text{SiO}_2$ nanofibres

The flexible  $\text{SiO}_2$  nanofibres were prepared according to a modified sol-gel approach previously reported. Briefly, a silica gel with the molar composition of  $\text{H}_3\text{PO}_4$ : TEOS:  $\text{H}_2\text{O} = 0.04$ : 1: 11 were prepared by hydrolysis and polycondensation for 12 h at room temperature. Then, an equivalent weight of 10 wt% PVA aqueous solution was added into the silica gel and stirred for another 10 h. For the electrospinning process, the silica precursor solution was transferred into a 10-mL syringe. The applied voltage and tip-to-collector distance was fixed to be 10 kV and 12 cm, respectively. The feeding rate was set at  $0.5\ \text{mL h}^{-1}$ . The as-spun nanofibres were dried at  $37\ ^\circ\text{C}$  overnight and calcined at  $800\ ^\circ\text{C}$  for 3 h to remove PVA.

### Growth of $\text{NaYF}_4\text{:Yb,Er}$ nanoparticles on $\text{SiO}_2$ nanofibres

$\text{NaYF}_4\text{:Yb,Er}$  nanoparticles (UCNP) assembled  $\text{SiO}_2$  ( $\text{SiO}_2\text{@UCNP}$ ) nanofibres were prepared via a solvothermal method. Firstly, a transparent solution, labeled as solution A, was prepared by dissolving 1.2 mmol of NaCl, 0.48 mmol of  $\text{YCl}_3 \cdot 6\text{H}_2\text{O}$ , 0.108 mmol of  $\text{YbCl}_3 \cdot 6\text{H}_2\text{O}$  and 0.012 mmol of  $\text{ErCl}_3 \cdot 6\text{H}_2\text{O}$  in 9 ml of ethylene glycol (EG). Then, the other transparent solution, labeled as solution B, was obtained through mixing 3.0 mmol of  $\text{NH}_4\text{F}$  and 0.006 mmol of hydrophilic polyethylenimine (PEI) in 6 ml of EG. Subsequently, solution A was added into solution B, and stirred for 10 minutes. Afterwards, the precursor solution with  $\text{SiO}_2$  membrane was sealed into a 25 mL Teflon-lined autoclave and kept the temperature at  $200\ ^\circ\text{C}$  for 120 minutes before cooled down to room temperature. Finally, the as-prepared  $\text{SiO}_2\text{@UCNP}$  membrane was rinsed with distilled water and ethanol several times, and dried at  $80\ ^\circ\text{C}$  for 12 h. To optimize the loading of UCNPs, varied solvothermal time (90, 120, 150 min) and different mass of  $\text{SiO}_2$  nanofiber (5, 10, 15 mg) were explored.

### **Conjugation of Molecular beacon with UCNF (Table 1)**

Molecular beacons (MB) were covalently conjugated to SiO<sub>2</sub>@UCNP nanofibres through the amine groups of PEI on SiO<sub>2</sub>@UCNP nanofibres and carboxyl groups of MBs. Firstly, carboxyl group-modified molecular beacon (30 µL, 100 µM), N-hydroxy-succinimide (NHS, 200 µL, 2 mg L<sup>-1</sup>) and 1-ethyl-3-(3-dimethylaminopropyl) carbodiimide (EDC, 400 µL, 2 mg mL<sup>-1</sup>) were incubated in 2.5 mL of ultrapure water at 37 °C for 1 h. Then 5 mg of SiO<sub>2</sub>@UCNP membrane was added to the above solution and reacted at 37 °C for 24 h. The MB grafted SiO<sub>2</sub> membrane were finally obtained by rinsing with ultrapure water several times and stored at 4 °C for further use.

### **Detection of target miRNA**

5 mg of MB grafted SiO<sub>2</sub>@UCNP membrane (miRNA biosensor membrane) was immersed into 2 mL of target miRNA (miRNA-21) with the concentrations ranging from 2 nM to 500 nM and incubated at 37 °C for 1 h. Then the miRNA biosensor membrane was rinsed with ultrapure water several times and dried at 37 °C for 24 h. To test the specificity of the miRNA biosensor membrane, miRNA-21 with single-base mismatch, miRNA-21 with three-base mismatch and miRNA-195 with a concentration of 10 nM were used via a similar protocol. Similar procedure was used for the detection of miRNA-21 in 10 % fetal bovine serum.

### **Characterization**

The morphology, microstructure and composition of UCNF and fibres were investigated by a Hitachi SU-70 field-emission scanning electron microscope (FESEM) and a FEI Tecnai F20 high-resolution transmission electron microscope (HRTEM). The UCPL spectra were obtained under the excitation of a continuous laser with a wavelength of 980 nm from a fluorescence spectrophotometer (PL, FLSP920, Edinburgh). FTIR spectra were recorded on a PerkinElmer 580B (Tensor 27, Bruker) infrared spectrophotometer using the KBr pellet technique. The zeta potential of materials was measured by a Zetasizer (Zetasizer Nano-ZS, Malvern). UV-vis spectroscopy measurements were performed on a TU-1810 UV-vis spectrophotometer. A thermogravimetric/differential scanning calorimetry (TG-DSC, DSCQ1000, the USA) was used to verify the thermal decomposition of as-spun fibres. The X-ray diffraction (XRD) patterns were obtained by a thermo ARL X'TRA powder diffractometer.

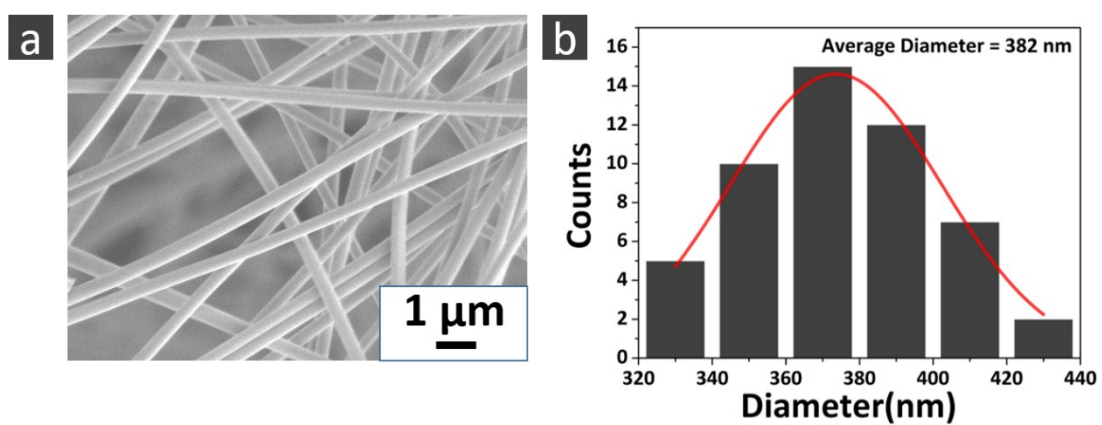

**Fig. S1** (a) SEM image and (b) diameter distribution of electrospun  $\text{SiO}_2$  fibres.

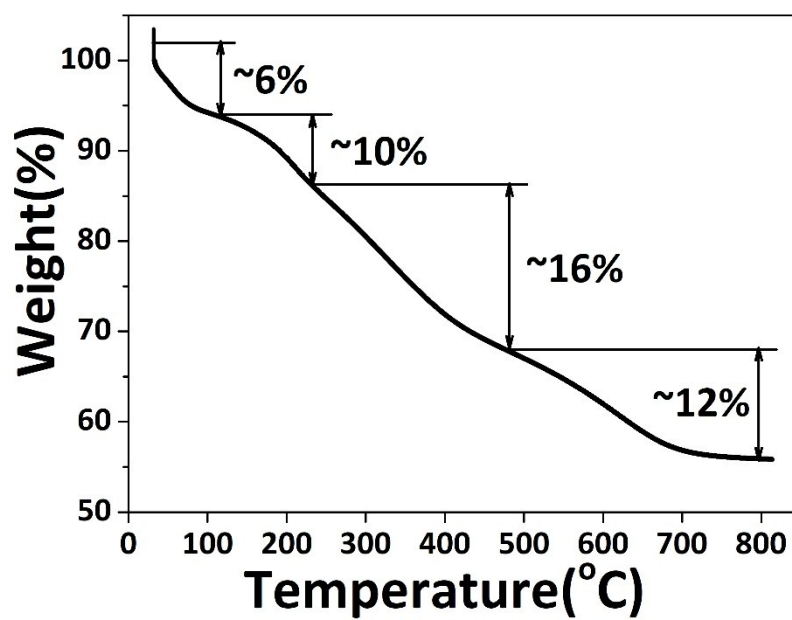

**Fig. S2** TG analysis of electrospun PVA/ $\text{SiO}_2$  fibres.

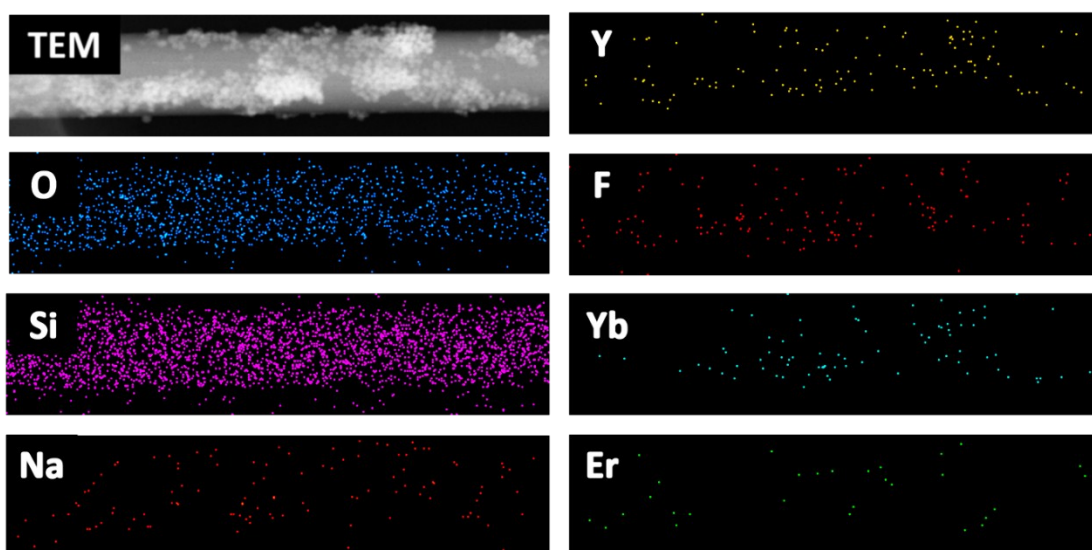

**Fig. S3** Elemental mapping of  $\text{SiO}_2$ @UCNP fibres.

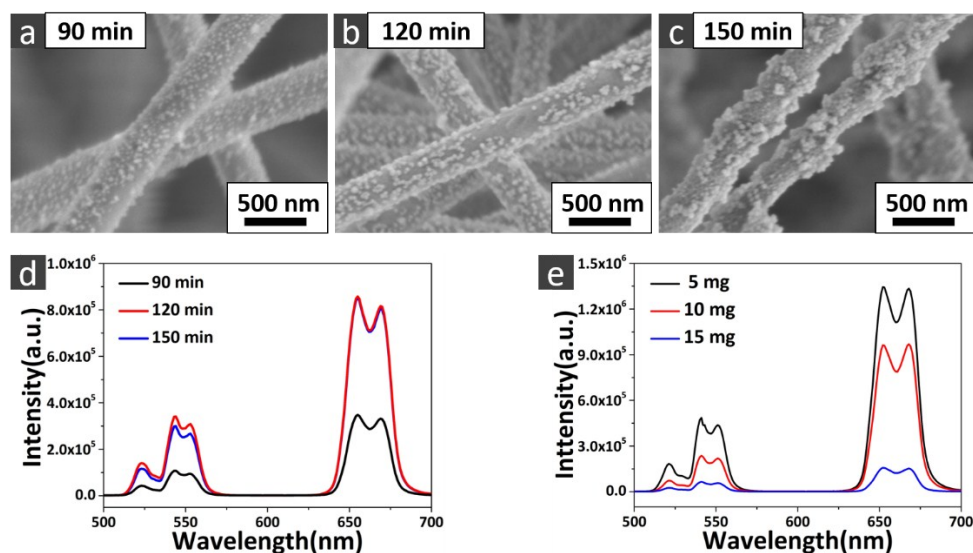

**Fig.S4** (a) and (b) Upconversion luminescence spectra of electrospun  $\text{SiO}_2$ @UCNP nanofibers of varied solvothermal time and different mass of  $\text{SiO}_2$  nanofiber added; (c)-(e) SEM images of electrospun  $\text{SiO}_2$ @UCNP nanofibers of varied solvothermal time: 90, 120, 150 min, respectively.

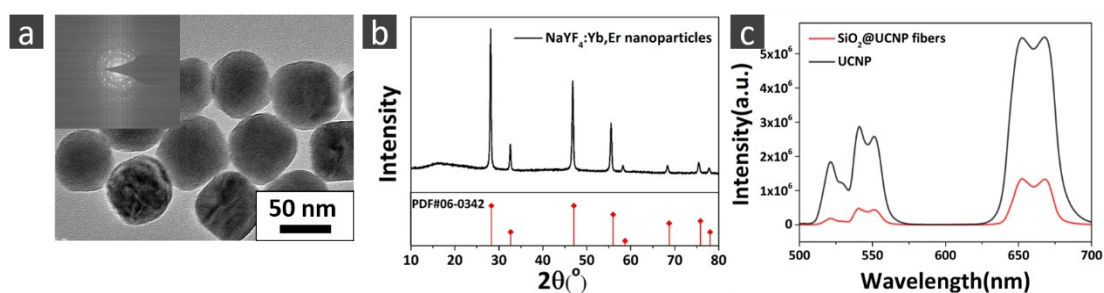

**Fig. S5** (a) TEM image and (b) XRD pattern of  $\text{NaYF}_4:\text{Yb,Er}$  nanoparticles; (c) Upconversion luminescence spectra of  $\text{SiO}_2$ @UCNP fibres and UCNPs.

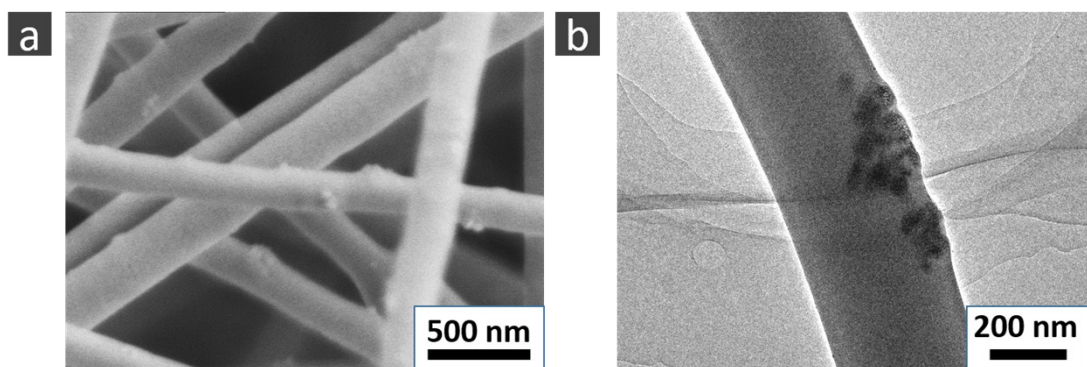

**Fig. S6** SEM (a) and TEM (b) images of electrospun  $\text{NaYF}_4:\text{Yb,Er}$  nanoparticles embedded  $\text{SiO}_2$  nanofibres reported previously.

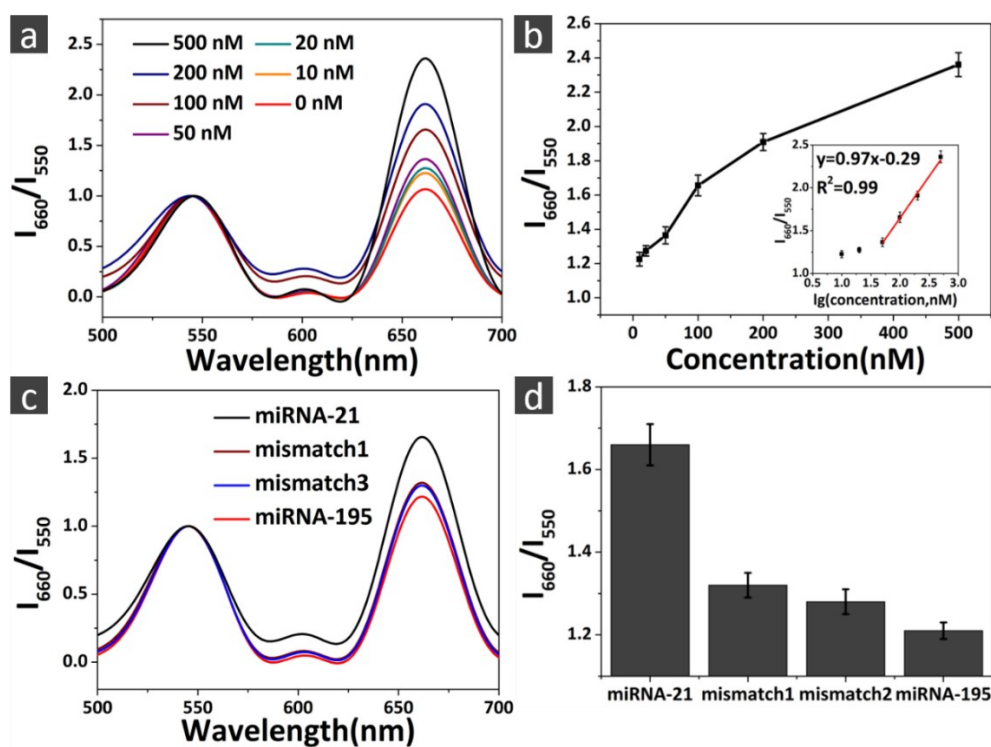

**Fig.S7** (a) Upconversion luminescence spectra of  $\text{SiO}_2@\text{UCNP-MB}$  biosensor incubated with 10%vol fetal bovine serum with different miRNA-21 concentrations; (b) Relationship between  $I_{660}/I_{550}$  ratio and miRNA-21 concentration in fetal bovine serum; (c) and (d) specific detection of miRNA-21, miRNA-21 with single base mismatch, miRNA-21 with three bases mismatches and miRNA-195 in 10% fetal bovine serum.

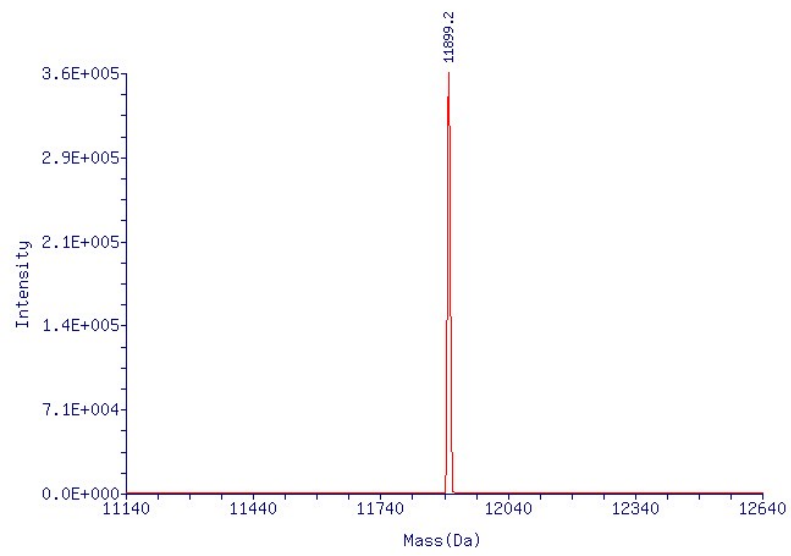

**Fig. S8** Mass data of molecular beacons.
